# Supplementary material for: Climate-related environmental stress in intertidal grazers: scaling-up biochemical responses to assemblage-level processes
Source: PeerJ. 2016 Oct 20;4:e2533. doi: 10.7717/peerj.2533 (PMC5075701; doi:10.7717/peerj.2533)
Supplement: Data S1 [file peerj-04-2533-s001.xlsx]

## Sheet: Final data
Height	Catalase	GlutRed	TotGlut	GrowthRate	IntStrength
0	55.375	0.007	0.57	0.3125	-0.611558
0	21.5	0.007	0.4925	0	-1.00421
0	27.65	0.0095	0.865	0.025	-0.317068
0	36.7	0.009	0.92	0.033333	-1.10237
0	12.65	0.008	0.325	0.005602	-1.20054
0	16.05	0.0055	0.805	-0.142857	-0.611558
0	23.4	0.009	0.66	0	-1.05329
0	45	0.006	0.6075	0.0625	-1.10237
0	54.5	0.0075	0.45	0.033096	-1.00421
0	17.4	0.005	0.845	0	-1.00421
0	36.35	0.0095	0.6688	0.194332	-0.709721
0	4.3	0.0015	0.3663	0.169608	-0.169823
0	67	0.004	0.525	0.22449	-0.758803
0	27.35	0.006	0.7375	0.127255	0.615484
0	24.5	0.008	1.7925	0	0.468239
0	24.45	0.0105	0.4575	-0.027778	-0.660639
0	113.9	0.01	0.62	0.061111	-1.05329
0	26.5	0.006	0.8675	0.056905	-1.2987
15	14.4	0.0035	0.4975	0.028369	-0.684115
15	38.0625	0.005	1.245	0.140991	-0.65901
15	29.4	0.0085	0.469	0.114038	-0.407958
15	22.2	0.007	0.47	-0.058824	-0.633904
15	14.75	0.004	0.41	0	-0.70922
15	20	0.0075	0.58	-0.094089	-0.70922
15	14.4	0.005	0.445	0.0625	-0.65901
30	46.1	0.006	0.37	0.070588	2.0242
30	66.85	0.007	0.44375	0	-0.401606
30	17.2	0.0055	0.4625	-0.058824	-0.671141
30	35.55	0.0095	0.55	0.029028	0.406997
30	34	0.008	0.305	-0.043478	-0.671141
30	19.8	0.0055	0.47	0.05625	1.2156
30	7.75	0.0025	0.47	0.025446	-0.132072
30	NA	NA	0.5375	-0.031349	-0.671141
